# Supplementary material for: In situ high-precision lithium isotope analyses at low concentration levels with femtosecond-LA-MC-ICP-MS
Source: Royal Society of Chemistry journal article supplement (doi:10.1039/c9ja00088g), 2019-01-01
Supplement: c9ja00088g1.pdf [file c9ja00088g1.pdf]

## Electronic Supplementary Information (ESI)

Table S 1: Conditions of the Neptune Plus MC-ICP-MS

| MC-ICP-MS          | ThermoScientific Neptune Plus |
|--------------------|-------------------------------|
| Cool gas (Ar)      | 15 l/min                      |
| Auxiliary gas (Ar) | 0.7 – 0.8 l/min               |
| Sample gas (Ar)    | 1.18 – 1.2 l/min              |
| Carrier gas (He)   | 0.75 – 0.81 l/min             |
| RF power           | 900 W                         |
| Sample cone        | Ni H                          |
| Skimmer cone       | Ni X                          |

Table S 2: Calculation for error propagation

|                |        |                                                                                                                      |
|----------------|--------|----------------------------------------------------------------------------------------------------------------------|
| Noise Error    | Step 1 | $NE = \frac{SE}{(\text{measured signal})}$                                                                           |
|                | Step 2 | $NE_{\frac{7}{6}\text{Li}} = \sqrt{(RSE_{\text{detector}_{7\text{Li}}})^2 + (RSE_{\text{detector}_{6\text{Li}}})^2}$ |
| Counting error | Step 1 | See Eq. (3)                                                                                                          |
|                | Step 2 | See Eq. (4)                                                                                                          |
| Total error    |        | $TE_{\frac{7}{6}\text{Li}} = \sqrt{(NE_{\frac{7}{6}\text{Li}})^2 + (CE_{\frac{7}{6}\text{Li}})^2}$                   |

Table S 3:  $\delta^7\text{Li}$  values measured by fs-LA-MC-ICP-MS in this study.

| $\delta^7\text{Li}$ (‰) | MPI-DING reference glasses |        |          |        |      |            | USGS reference glasses |        |         |     |
|-------------------------|----------------------------|--------|----------|--------|------|------------|------------------------|--------|---------|-----|
|                         | KL2-G                      | ML3B-G | GOR128-G | ATHO-G | T1-G | StHs6/80-G | BIR-1G                 | BCR-2G | BHVO-2G |     |
| 6.5                     | 5.1                        | 12.6   | 13.6     | 2.1    | 1.7  | 2.1        | 3.7                    | 4.8    | 5.1     | 4.8 |
| 6.5                     | 5.8                        | 12.0   | 11.9     | 3.2    | 0.3  | 2.4        | 3.5                    | 3.3    | 3.9     | 4.1 |
| 5.5                     | 5.2                        | 12.9   | 16.7     | 1.8    | 2.4  | 2.9        | 1.6                    | 2.7    | 3.2     | 5.7 |
| 3.9                     | 3.6                        | 15.2   | 16.2     | 5.0    | 1.7  | 2.0        | 5.1                    | 4.0    | 4.1     | 5.8 |
| 3.9                     | 1.7                        | 14.3   | 13.7     | 4.4    | 1.9  | 5.6        |                        | 2.8    | 4.5     | 6.3 |
| 2.1                     | 3.4                        | 14.2   | 12.1     | 3.5    | 0.8  | 3.4        |                        | 2.7    | 5.9     | 5.9 |
| 5.7                     | 2.3                        | 14.5   | 12.7     | 4.4    | 1.2  | 2.5        |                        | 3.2    | 4.8     | 6.8 |
| 5.2                     | 2.1                        | 15.7   | 12.1     | 4.5    | -0.2 | 2.1        |                        | 2.8    | 3.0     | 7.7 |
| 4.3                     | 2.2                        | 14.0   | 13.6     | 6.5    | 1.8  | 3.7        |                        | 3.2    | 2.7     | 8.9 |
| 4.7                     | 2.0                        | 15.9   |          | 4.8    | 1.9  | 2.2        |                        | 5.4    | 5.6     | 5.6 |
|                         |                            | 1.0    | 14.3     |        | 0.6  | 3.2        |                        | 4.5    |         | 7.1 |
|                         |                            |        | 13.4     |        | -0.6 | 2.7        |                        |        |         |     |
|                         |                            |        | 13.0     |        | 2.4  | 3.0        |                        |        |         |     |
|                         |                            |        | 14.7     |        | 1.9  | 3.8        |                        |        |         |     |
|                         |                            |        | 12.2     |        | 0.7  | 2.3        |                        |        |         |     |
|                         |                            |        | 13.3     |        | 3.2  | 3.6        |                        |        |         |     |
|                         |                            |        | 15.6     |        | 0.5  | 2.9        |                        |        |         |     |
|                         |                            |        | 14.7     |        | 0.3  | 2.9        |                        |        |         |     |
| <b>mean</b>             | 4.8                        | 3.1    | 13.9     | 4.0    | 1.2  | 3.1        |                        | 3.6    | 4.3     | 6.2 |
| <b>2 SD</b>             | 2.7                        | 3.2    | 2.8      | 2.8    | 2.0  | 1.9        |                        | 1.9    | 2.2     | 2.7 |
| <b>n</b>                | 10                         | 11     | 27       | 10     | 18   | 22         |                        | 11     | 10      | 11  |
